# Supplementary material for: The Combined Effects of Azoxystrobin and the Biosurfactant-Producing Bacillus sp. Kol B3 against the Phytopathogenic Fungus Fusarium sambucinum IM 6525
Source: MDPI journal article supplement (doi:10.3390/ijms25084175), 2024-04-10
Supplement: s1 [file s1]

**Table S1.** Identification of bacterial strain Kol B3 based on the similarity of the *tuf* gene sequence to the sequences stored in the NCBI database.

| Bacterial strain | Sequence length [bp] | The genus/species of bacteria with the greatest similarity to the NCBI sequence | NCBI Sequence No. | Degree of Similarity [%] | Identification      |
|------------------|----------------------|---------------------------------------------------------------------------------|-------------------|--------------------------|---------------------|
| Kol B3           | 720                  | <i>B. velezensis</i>                                                            | CP031694.1        | 100                      | <i>Bacillus</i> sp. |
|                  |                      | <i>B. amyloliquefaciens</i>                                                     | CP014700.1        | 100                      |                     |
|                  |                      | <i>B. methylotrophicus</i>                                                      | LN999829.1        | 100                      |                     |

**Table S2.** The influence of AZ on *Bacillus* sp. Kol B3 bacteria growth.

| Cultivation variant | Dried biomass [mg] | Bacterial CFU                  |
|---------------------|--------------------|--------------------------------|
| Kol B3 (control)    | 21 ± 2             | 10.03 ± 5.95 × 10 <sup>8</sup> |
| Kol B3 + AZ         | 22 ± 2             | 11.53 ± 7.01 × 10 <sup>8</sup> |

Kol B3 (control) – biotic control of *Bacillus* sp. Kol B3; Kol B3 + AZ – cultivation of *Bacillus* sp. Kol B3 amended with azoxystrobin.

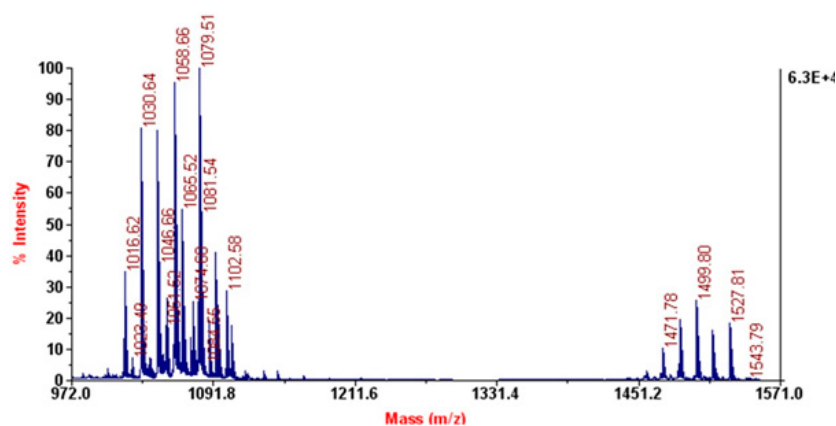

**Figure S1.** MALDI-TOF/TOF mass spectrum of the lipopeptide mixture presented in an extract prepared by a modified QuEChERS procedure from the culture supernatant of *Bacillus* sp. Kol B3.
